# Supplementary material for: Curcumin inhibits HIV-1 by promoting Tat protein degradation
Source: PubMed Central journal article supplement (PMC4901322; doi:10.1038/srep27539), 2016-06-10
Supplement: srep27539-s1.pdf [file srep27539-s1.pdf]

## Supplementary information

### Curcumin inhibits HIV-1 by promoting Tat protein degradation.

Amjad Ali, Akhil C Banerjea\*

**Institutional Affiliations:** Laboratory of Virology, National Institute of Immunology, New Delhi, India. Email: [amjad139@gmail.com](mailto:amjad139@gmail.com) , [akhil@nii.res.in](mailto:akhil@nii.res.in).

**\*Correspondence author:** Dr. Akhil C. Banerjea, & **Amjad Ali**, Virology Lab, National Institute of Immunology, Aruna Asaf Ali Marg, New Delhi-110067, India; Tel: +91-011-26703616; Mobile: +91-9818717833; Fax: +91-011-26742125; Email: [akhil@nii.res.in](mailto:akhil@nii.res.in), [akhil@nii.ac.in](mailto:akhil@nii.ac.in), [amjad139@gmail.com](mailto:amjad139@gmail.com)

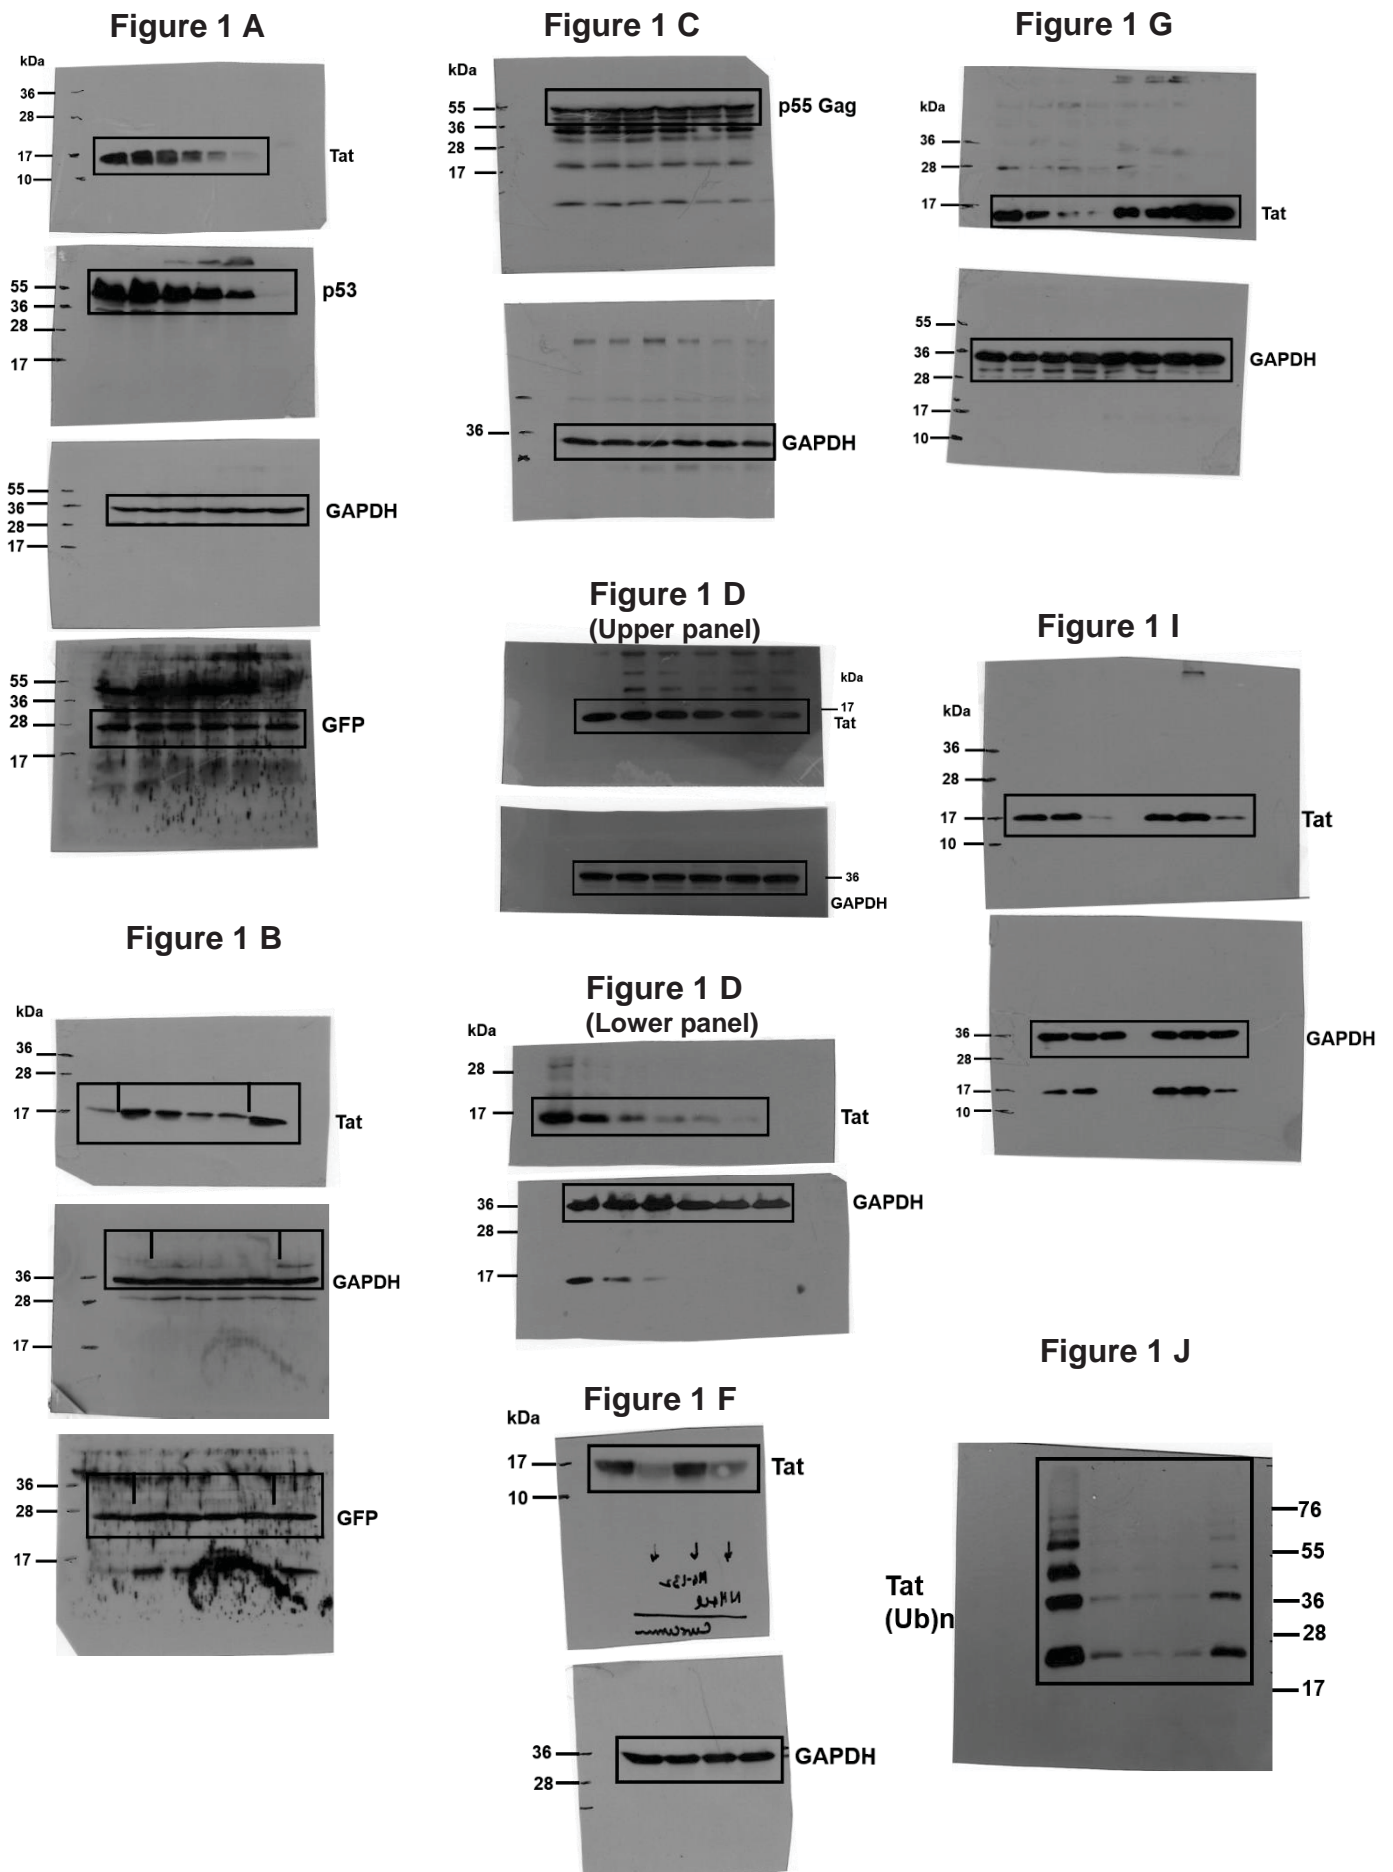

**Supplementary Figure 1 :** Uncropped images of western blots with molecular size marker (kDa).
